# Supplementary material for: Formation of cobalt-Prussian Blue nanoparticles in a biopolymer matrix
Source: Royal Society of Chemistry journal article supplement (doi:10.1039/c0nr00382d), 2010-01-01
Supplement: c0nr00382d.pdf [file c0nr00382d.pdf]

## Formation of cobalt-Prussian Blue nanoparticles in a biopolymer matrix

By Andrew M. Collins, Stephen Mann and Simon R. Hall

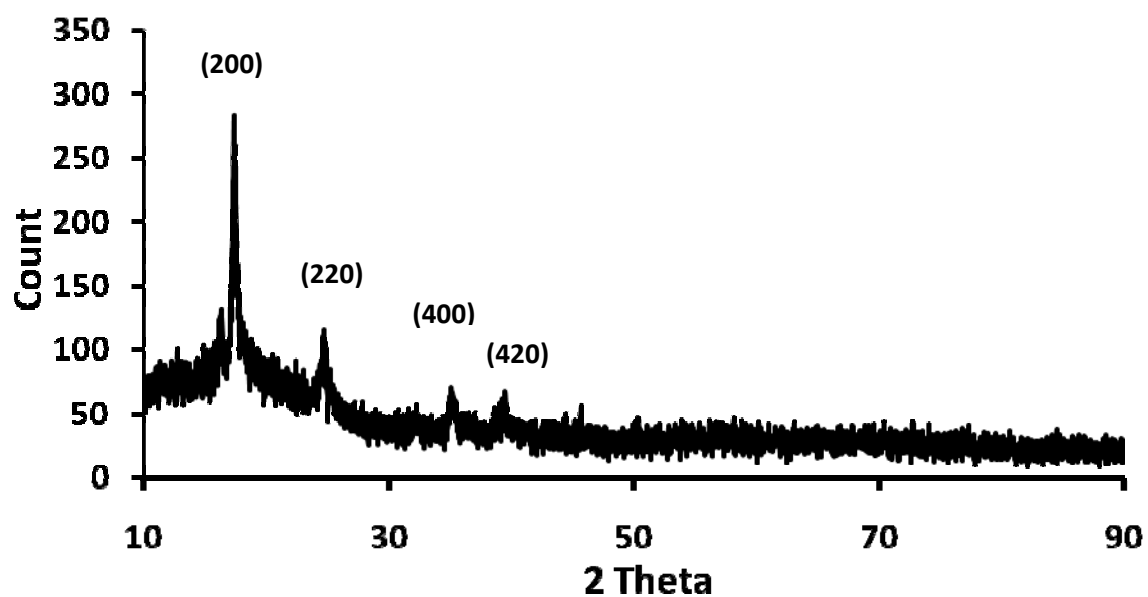

Figure S1. XRD pattern obtained from a cast film of chitosan containing cobalt hexacyanoferrate nanoparticles. Peaks are indexed to  $\text{Co}_3[\text{Fe}(\text{CN})_6]\cdot 10\text{H}_2\text{O}$  (JCPDS card no. 46-907).

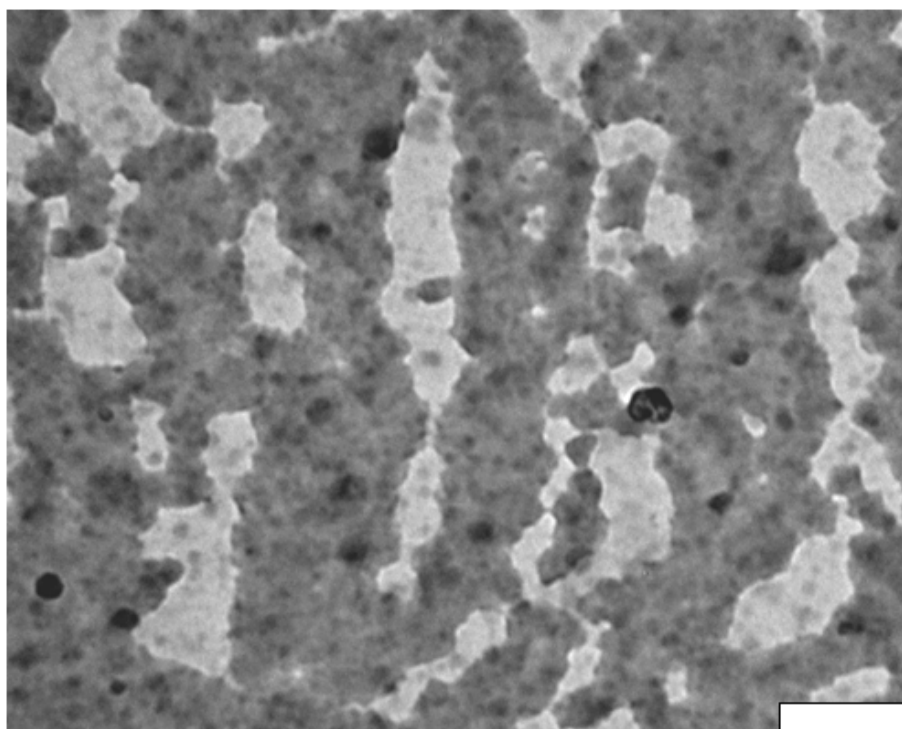

Figure S2 TEM micrograph depicting a film of chitosan and cobalt hexacyanoferrate prepared from a 1wt% chitosan casting solution. Scale bar 200 nm
